# Supplementary material
Source: publisher figshare collection journal article supplement (https://karger.figshare.com/ndownloader/files/39591259)
Supplement: Supplementary file 1 [file 39591259]

**Supplementary Table 2** shows metastasis-free probability in 6-month intervals after primary tumor treatment.

| **Months after treatment** | **Metastasis-free probability** | **95% Confidence Interval** |
| --- | --- | --- |
| 6 | 0.99 | 0.98 - 1 |
| 12 | 0.94 | 0.89 – 0.98 |
| 18 | 0.91 | 0.86 - 0.96 |
| 24 | 0.87 | 0.81 - 0.94 |
| 30 | 0.83 | 0.75 - 0.91 |
